## Correction for: Circ-BPTF promotes bladder cancer progression and recurrence through the miR-31-5p/RAB27A axis

Junming Bi<sup>1,2,\*</sup>, Hongwei Liu<sup>1,2,\*</sup>, Zijian Cai<sup>1,2,\*</sup>, Wei Dong<sup>1,2</sup>, Ning Jiang<sup>1,2</sup>, Meihua Yang<sup>1,2</sup>, Jian Huang<sup>1,2</sup>, Tianxin Lin<sup>1,2</sup>

<sup>1</sup>Department of Urology, Sun Yat-Sen Memorial Hospital, Sun Yat-Sen University, Guangzhou, PR China

<sup>2</sup>Guangdong Provincial Key Laboratory of Malignant Tumor Epigenetics and Gene Regulation, Sun Yat-Sen Memorial Hospital, Sun Yat-Sen University, Guangzhou, PR China

\*Equal contribution

Correspondence to: Tianxin Lin, Jian Huang; email: [lintx@mail.sysu.edu.cn](mailto:lintx@mail.sysu.edu.cn), [urolhj@sina.com](mailto:urolhj@sina.com)

Original article: *Aging (Albany NY)* 2018; 8: pp 1964–1976

PMID: 30103209

PMCID: PMC6128440

doi: [10.18632/aging.101520](https://doi.org/10.18632/aging.101520)

**This article has been corrected:** The authors replaced in **Figures 3**: panel **3A**, where the UM-UC-3 migration/NC image was mistakenly reused as the UM-UC-3 invasion/NC image and new image of “UM-UC-3 invasion/NC” from the same set of experiments was used for the new panel; and panel **3C**, where the 0h T24/NC image was mislabeled as the 0h UM-UC-3/NC and 0h T24/Si-cBPTF was mislabeled as the 0h UM-UC-3/ Si-cBPTF during the picture capturing. The new images of 0h UM-UC-3/NC and 0h UM-UC-3/ Si-cBPTF from the same set of experiments were used for the new panels.

The authors replaced in **Figures 7** panel **7C**, where the UM-UC-3(NC and miR-31 mimics) GAPDH image was mistakenly reused as the T24(NC and miR-31 mimics) GAPDH image. The new panel **7C** contains new T24 images of GAPDH from the same set of experiments.

These alterations do not affect the results or conclusions of this work. The new **Figure 3** and **Figure 7** are presented below.

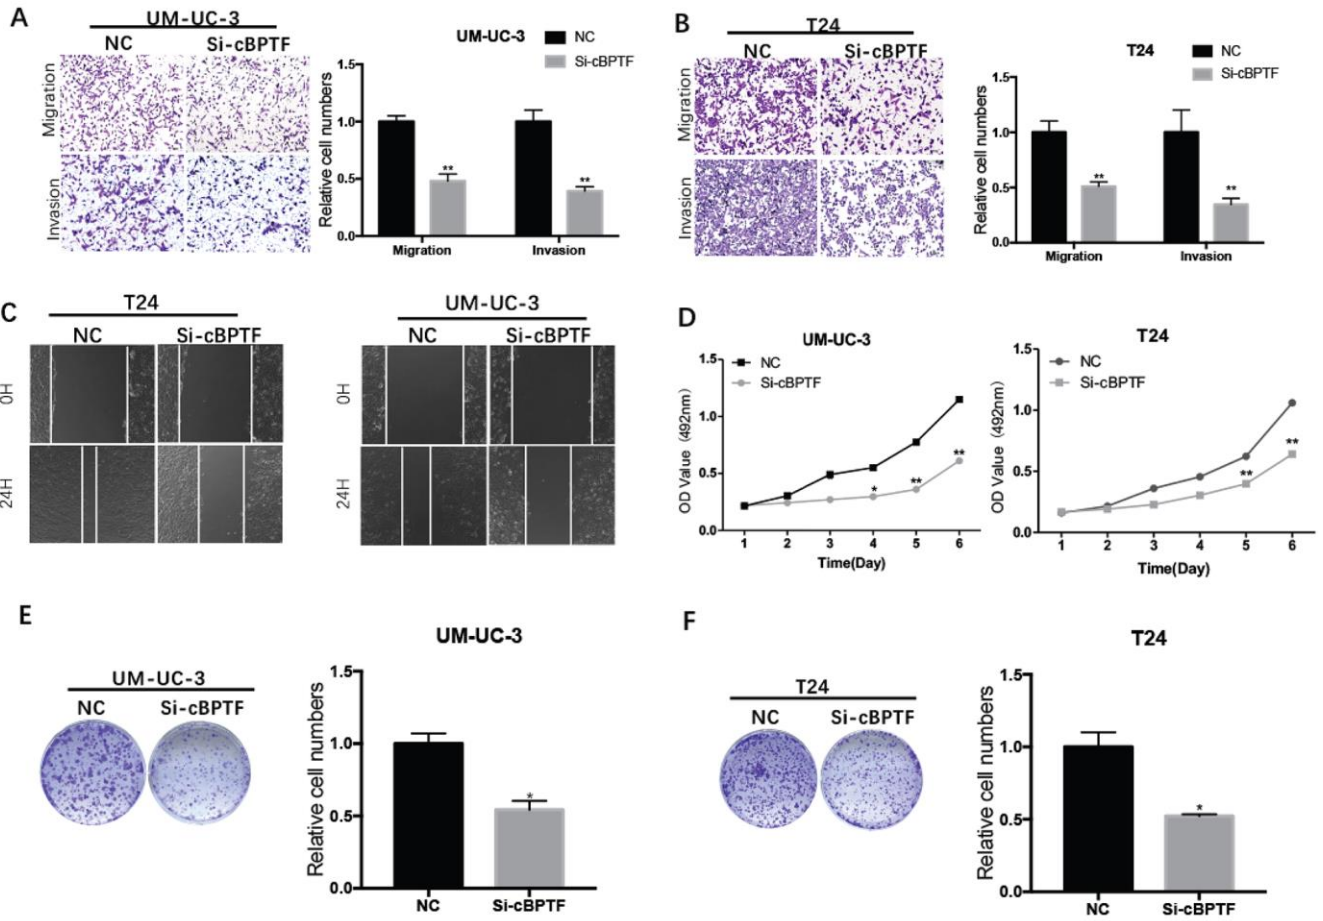

**Figure 3. Circ-BPTF promotes progression of BCa cells *in vitro*.** (A, B and C) Effects of circ-BPTF on cell migratory and invasive capabilities were assessed by transwell migration, Matrigel invasion and wound-healing assays. (D-F) MTS and clone-formation assays showed that the proliferative ability was decreased in T24 and UM-UC-3 cells transfected with si-circ-BPTF. Data indicate the means  $\pm$  SEM. \* $P < 0.05$ , \*\* $P < 0.01$ .

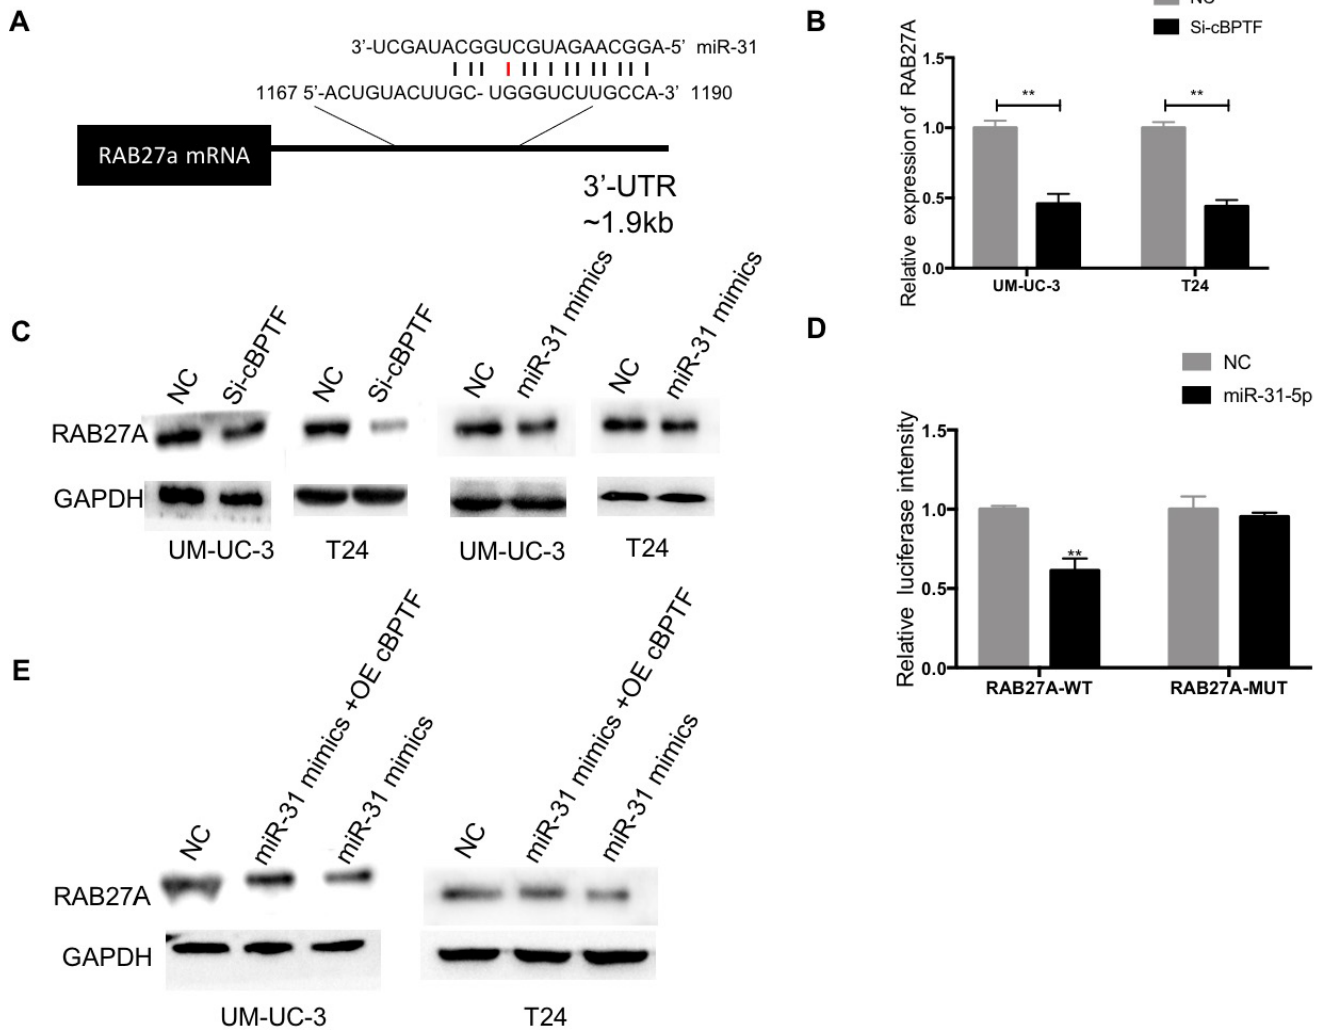

**Figure 7. Circ-BPTF promotes BCa proliferation and migration through the miR-31-5p/RAB27A axis.** (A) Schematic of predicted miR-31-5p binding sites in the 3' UTR of RAB27A, with complementary pairs showed in black and mismatches showed in red. (B) Expression levels of RAB27A were detected following knockdown of circ-BPTF by qPCR. (C) Western blotting analysis of RAB27A in BCa cell lines upon knockdown of circ-BPTF and overexpression of miR-31-5p. GAPDH was used as a loading control. (D) miR31-5p decreases the luciferase activities of the wild-type RAB27A 3' UTR reporter but not the luciferase activities of the mutant RAB27A 3' UTR reporter. (E) Rescue experiment was performed to analyze RAB27A at protein level by western blotting. GAPDH was used as a loading control. \*\*P<0.01.
